# Supplementary material
Source: MDPI journal article supplement (https://www.mdpi.com/2311-7524/8/7/578)
Supplement: s1 [file s1]

## Supplementary Materials

**Table S1** Further explanation of location, onion cultivation, and disease assessment in the disease survey fields

| Year <sup>a</sup> | Location   | Field | Investigation spot               | Onion cultivation | Disease assessment of onion downy mildew  |                           |
|-------------------|------------|-------|----------------------------------|-------------------|-------------------------------------------|---------------------------|
|                   |            |       |                                  | Mulching          | Onion trial plots                         | Number of Assessed plants |
| 2016              | Saga       | A     | 33°13'04.92"N,<br>130°18'43.46"E | Polythene mulch   | 1 × 1 m,<br>2 replicates                  | 20 × 2                    |
|                   | Shiro-ishi | B     | 33°09'07.08"N,<br>130°09'16.87"E | —                 | 1 × 1.5 m,<br>2 replicates                | 20 × 2                    |
|                   | Saga       | C     | 33°13'04.82"N,<br>130°18'43.99"E | Polythene mulch   | 1 × 1 m,<br>2 replicates                  | 20 × 2                    |
|                   | Shiro-ishi | D     | 33°11'55.95"N,<br>130°06'34.52"E | —                 | 7.5 × 10 m,<br>no replicates <sup>b</sup> | 100 × 3                   |
|                   | Saga       | E     | 33°13'04.93"N,<br>130°18'40.00"E | —                 | 1 × 1 m,<br>2 replicates <sup>c</sup>     | 20 × 2                    |
| 2017              | Saga       | F     | 33°13'04.04"N,<br>130°18'32.55"E | Polythene mulch   | 1 × 2 m,<br>3 replicates                  | 50 × 3                    |
|                   | Shiro-ishi | B     | 33°09'07.08"N,<br>130°09'16.87"E | —                 | 1 × 20 m,<br>no replicates <sup>b</sup>   | 50 × 3                    |
|                   | Saga       | E     | 33°13'03.34"N,<br>130°18'39.99"E | —                 | 1 × 2 m,<br>2 replicates <sup>c</sup>     | 40 × 2                    |
|                   | Shiro-ishi | G     | 33°09'07.72"N,<br>130°09'14.90"E | —                 | 1 × 2 m,<br>2 replicates <sup>c</sup>     | 20 × 2                    |
| 2018              | Saga       | H     | 33°13'05.17"N,<br>130°18'42.48"E | Polythene mulch   | 1 × 2 m,<br>3 replicates                  | 50 × 3                    |
|                   | Saga       | I     | 33°13'12.99"N,<br>130°18'38.60"E | —                 | 1 × 14 m,<br>no replicates <sup>b</sup>   | 50 × 3                    |
|                   | Shiro-ishi | B     | 33°09'07.08"N,<br>130°09'16.87"E | —                 | 1 × 20 m,<br>no replicates <sup>b</sup>   | 50 × 3                    |
|                   | Shiro-ishi | G     | 33°09'07.72"N,<br>130°09'14.90"E | —                 | 1 × 8 m,<br>no replicates <sup>b</sup>    | 50 × 3                    |

<sup>a</sup> The year when the disease development was assessed

<sup>b</sup> The area was divided into 3 quadrants, and 50–100 plants were randomly assessed within each section

<sup>c</sup> Part of experiments from another study

**Table S2** Meteorological stations located in the northern Kyushu district where the data used in this study were obtained

| Meteorological stations <sup>a</sup> |                       |                               | Mounting height of observation equipment above the ground level (m) |                                             |
|--------------------------------------|-----------------------|-------------------------------|---------------------------------------------------------------------|---------------------------------------------|
| Location                             |                       | Altitudes above sea level (m) | Electrical thermometer and electrical hygrometer                    | Combined wind vane and propeller anemometer |
| Saga City                            | 33°15.9'N, 130°18.3'E | 6                             | 1.5                                                                 | 56.1                                        |
| Sasebo City                          | 33°9.5'N, 129°43.6'E  | 4                             | 1.5                                                                 | 35.0                                        |
| Fukuoka City 1                       | 33°34.9'N, 130°22.5'E | 3                             | 1.5                                                                 | —                                           |
| Fukuoka City 2                       | 33°34.9'N, 130°22.6'E | 3                             | —                                                                   | 34.6                                        |
| Kumamoto City 1                      | 32°48.8'N, 130°42.4'E | 38                            | 1.5                                                                 | —                                           |
| Kumamoto City 2                      | 32°49.3'N, 130°42.9'E | 15                            | —                                                                   | 15.3                                        |

<sup>a</sup> All meteorological stations mentioned are run by the Japan Meteorological Agency

**Table S3** Decision logic regarding whether the disease development of onion downy mildew has occurred, the date obtained by back-calculating the latent period from the putative date of disease development, and the number of days of occurrence of favourable meteorological conditions for infection output by the risk model during the 3-day putative infection period<sup>a</sup>

|      |       | Disease development occurrence (whether incidence or severity have increased by ≥10% per 5 days) |               |              |                    |               |              |                               | Putative date of disease development                            |             |                                              | Number of favourable meteorological condition days         |                                                             |
|------|-------|--------------------------------------------------------------------------------------------------|---------------|--------------|--------------------|---------------|--------------|-------------------------------|-----------------------------------------------------------------|-------------|----------------------------------------------|------------------------------------------------------------|-------------------------------------------------------------|
| Year | Field | Starting point of each investigation                                                             |               |              | Next investigation |               |              | Decision:<br>0, no;<br>1, yes | Disease development<br>(Date C: the middle day of Date A and B) | Latent days | Date D<br>(Date back-calculated from Date C) | Infection period<br>(the previous 3 days including Date D) | Favourable and marginal conditions output by the risk model |
|      |       | Date A                                                                                           | Incidence (%) | Severity (%) | Date B             | Incidence (%) | Severity (%) |                               |                                                                 |             |                                              |                                                            |                                                             |
| 2016 | A     | 19 Mar.                                                                                          | 5.0           | 1.0          | 26 Mar.            | 10.0          | 2.0          | 0                             | 22 Mar.                                                         | 17          | 5 Mar.                                       | 3– 5 Mar.                                                  | 0.50                                                        |
|      |       | 26 Mar.                                                                                          | 10.0          | 2.0          | 31 Mar.            | 100           | 49.5         | 1                             | 28 Mar.                                                         | 21          | 7 Mar.                                       | 5– 7 Mar.                                                  | 1.00                                                        |
|      |       | 31 Mar.                                                                                          | 100           | 49.5         | 7 Apr.             | 100           | 67.5         | 1                             | 3 Apr.                                                          | 16          | 18 Mar.                                      | 16–18 Mar.                                                 | 0                                                           |
| 2016 | B     | 25 Mar.                                                                                          | 100           | 34.5         | 1 Apr.             | 100           | 48.0         | 0                             | 28 Mar.                                                         | 21          | 7 Mar.                                       | 5– 7 Mar.                                                  | 1.00                                                        |
| 2016 | C     | 16 Apr.                                                                                          | 100           | 25.5         | 23 Apr.            | 100           | 55.0         | 1                             | 19 Apr.                                                         | 10          | 9 Apr.                                       | 7– 9 Apr.                                                  | 2.25                                                        |
|      |       | 23 Apr.                                                                                          | 100           | 55.0         | 29 Apr.            | 100           | 87.0         | 1                             | 26 Apr.                                                         | 10          | 16 Apr.                                      | 14–16 Apr.                                                 | 0.50                                                        |
| 2016 | D     | 30 Mar.                                                                                          | 1.7           | 0.3          | 5 Apr.             | 2.3           | 0.5          | 0                             | 2 Apr.                                                          | 17          | 16 Mar.                                      | 14–16 Mar.                                                 | 0                                                           |
|      |       | 5 Apr.                                                                                           | 2.3           | 0.5          | 12 Apr.            | 8.0           | 1.6          | 0                             | 8 Apr.                                                          | 13          | 26 Mar.                                      | 24–26 Mar.                                                 | 0                                                           |
|      |       | 20 Apr.                                                                                          | 98.3          | 30.0         | 25 Apr.            | 100           | 42.1         | 1                             | 22 Apr.                                                         | 10          | 12 Apr.                                      | 10–12 Apr.                                                 | 0.50                                                        |
| 2016 | E     | 19 Apr.                                                                                          | 2.5           | 0.5          | 23 Apr.            | 37.5          | 7.5          | 1                             | 21 Apr.                                                         | 10          | 11 Apr.                                      | 9–11 Apr.                                                  | 0.75                                                        |
|      |       | 2 May                                                                                            | 50.0          | 11.5         | 9 May              | 92.5          | 21.0         | 1                             | 5 May                                                           | 10          | 25 Apr.                                      | 23–25 Apr.                                                 | 2.75                                                        |
|      |       | 9 May                                                                                            | 92.5          | 21.0         | 15 May             | 100           | 59.0         | 1                             | 12 May                                                          | 10          | 2 May                                        | 30 Apr.– 2 May                                             | 0.25                                                        |
| 2017 | F     | 28 Mar.                                                                                          | 0             | 0            | 31 Mar.            | 0             | 0            | 0                             | 29 Mar.                                                         | 26          | 3 Mar.                                       | 1– 3 Mar.                                                  | 0.25                                                        |
|      |       | 31 Mar.                                                                                          | 0             | 0            | 4 Apr.             | 0             | 0            | 0                             | 2 Apr.                                                          | 23          | 10 Mar.                                      | 8–10 Mar.                                                  | 0                                                           |
|      |       | 4 Apr.                                                                                           | 0             | 0            | 7 Apr.             | 0             | 0            | 0                             | 5 Apr.                                                          | 21          | 15 Mar.                                      | 13–15 Mar.                                                 | 0                                                           |
|      |       | 7 Apr.                                                                                           | 0             | 0            | 11 Apr.            | 0             | 0            | 0                             | 9 Apr.                                                          | 16          | 24 Mar.                                      | 22–24 Mar.                                                 | 0                                                           |
|      |       | 11 Apr.                                                                                          | 0             | 0            | 14 Apr.            | 0             | 0            | 0                             | 12 Apr.                                                         | 13          | 30 Mar.                                      | 28–30 Mar.                                                 | 0.25                                                        |
|      |       | 14 Apr.                                                                                          | 0             | 0            | 17 Apr.            | 0             | 0            | 0                             | 15 Apr.                                                         | 11          | 4 Apr.                                       | 2– 4 Apr.                                                  | 0.25                                                        |
|      |       | 17 Apr.                                                                                          | 0             | 0            | 19 Apr.            | 22.0          | 4.4          | 1                             | 18 Apr.                                                         | 11          | 7 Apr.                                       | 5– 7 Apr.                                                  | 1.00                                                        |
|      |       | 19 Apr.                                                                                          | 22.0          | 4.4          | 23 Apr.            | 43.3          | 10.0         | 1                             | 21 Apr.                                                         | 11          | 10 Apr.                                      | 8–10 Apr.                                                  | 3.00                                                        |
|      |       | 23 Apr.                                                                                          | 43.3          | 10.0         | 25 Apr.            | 76.0          | 17.1         | 1                             | 24 Apr.                                                         | 10          | 14 Apr.                                      | 12–14 Apr.                                                 | 0                                                           |
|      |       | 25 Apr.                                                                                          | 76.0          | 17.1         | 28 Apr.            | 80.7          | 19.5         | 0                             | 26 Apr.                                                         | 10          | 16 Apr.                                      | 14–16 Apr.                                                 | 1.00                                                        |
| 2017 | B     | 4 Apr.                                                                                           | 0             | 0            | 7 Apr.             | 0             | 0            | 0                             | 5 Apr.                                                          | 21          | 15 Mar.                                      | 13–15 Mar.                                                 | 0                                                           |
|      |       | 7 Apr.                                                                                           | 0             | 0            | 11 Apr.            | 0             | 0            | 0                             | 9 Apr.                                                          | 16          | 24 Mar.                                      | 22–24 Mar.                                                 | 0                                                           |
|      |       | 11 Apr.                                                                                          | 0             | 0            | 14 Apr.            | 0             | 0            | 0                             | 12 Apr.                                                         | 13          | 30 Mar.                                      | 28–30 Mar.                                                 | 0.25                                                        |

Table S3 (continued)

| Year | Field | Disease development occurrence (whether incidence or severity have increased by $\geq 10\%$ per 5 days) |               |              |                           |               |              |                                      | Putative date of disease development                                   |                    |                                                     | Number of favourable meteorological condition days                |                                                                    |
|------|-------|---------------------------------------------------------------------------------------------------------|---------------|--------------|---------------------------|---------------|--------------|--------------------------------------|------------------------------------------------------------------------|--------------------|-----------------------------------------------------|-------------------------------------------------------------------|--------------------------------------------------------------------|
|      |       | <i>Starting point of each investigation</i>                                                             |               |              | <i>Next investigation</i> |               |              | <i>Decision:</i><br>0, no;<br>1, yes | <i>Disease development</i><br>(Date C: the middle day of Date A and B) | <i>Latent days</i> | <i>Date D</i><br>(Date back-calculated from Date C) | <i>Infection period</i><br>(the previous 3 days including Date D) | <i>Favourable and marginal conditions output by the risk model</i> |
|      |       | Date A                                                                                                  | Incidence (%) | Severity (%) | Date B                    | Incidence (%) | Severity (%) |                                      |                                                                        |                    |                                                     |                                                                   |                                                                    |
| 2017 | B     | 14 Apr.                                                                                                 | 0             | 0            | 18 Apr.                   | 0             | 0            | 0                                    | 16 Apr.                                                                | 11                 | 5 Apr.                                              | 3– 5 Apr.                                                         | 0                                                                  |
|      |       | 18 Apr.                                                                                                 | 0             | 0            | 21 Apr.                   | 0             | 0            | 0                                    | 19 Apr.                                                                | 11                 | 8 Apr.                                              | 6– 8 Apr.                                                         | 2.00                                                               |
|      |       | 21 Apr.                                                                                                 | 0             | 0            | 25 Apr.                   | 81.3          | 18.1         | 1                                    | 23 Apr.                                                                | 11                 | 12 Apr.                                             | 10–12 Apr.                                                        | 2.00                                                               |
|      |       | 25 Apr.                                                                                                 | 81.3          | 18.1         | 28 Apr.                   | 92.7          | 23.1         | 1                                    | 26 Apr.                                                                | 10                 | 16 Apr.                                             | 14–16 Apr.                                                        | 1.00                                                               |
| 2017 | E     | 10 Apr.                                                                                                 | 0             | 0            | 17 Apr.                   | 0             | 0            | 0                                    | 13 Apr.                                                                | 13                 | 31 Mar.                                             | 29–31 Mar.                                                        | 1.00                                                               |
|      |       | 17 Apr.                                                                                                 | 0             | 0            | 21 Apr.                   | 0             | 0            | 0                                    | 19 Apr.                                                                | 11                 | 8 Apr.                                              | 6– 8 Apr.                                                         | 2.00                                                               |
|      |       | 21 Apr.                                                                                                 | 0             | 0            | 24 Apr.                   | 61.3          | 12.5         | 1                                    | 22 Apr.                                                                | 11                 | 11 Apr.                                             | 9–11 Apr.                                                         | 3.00                                                               |
|      |       | 24 Apr.                                                                                                 | 61.3          | 12.5         | 27 Apr.                   | 86.3          | 18.0         | 1                                    | 25 Apr.                                                                | 10                 | 15 Apr.                                             | 13–15 Apr.                                                        | 0                                                                  |
|      |       | 27 Apr.                                                                                                 | 86.3          | 18.0         | 2 May                     | 95.0          | 20.5         | 0                                    | 29 Apr.                                                                | 10                 | 19 Apr.                                             | 17–19 Apr.                                                        | 1.25                                                               |
|      |       | 2 May                                                                                                   | 95.0          | 20.5         | 6 May                     | 100           | 25.0         | 0                                    | 4 May                                                                  | 10                 | 24 Apr.                                             | 22–24 Apr.                                                        | 0                                                                  |
|      |       | 6 May                                                                                                   | 100           | 25.0         | 11 May                    | 100           | 42.3         | 1                                    | 8 May                                                                  | 10                 | 28 Apr.                                             | 26–28 Apr.                                                        | 1.00                                                               |
|      |       | 11 May                                                                                                  | 100           | 42.3         | 15 May                    | 100           | 64.8         | 1                                    | 13 May                                                                 | 10                 | 3 May                                               | 1– 3 May                                                          | 0.75                                                               |
|      | G     | 7 Apr.                                                                                                  | 0             | 0            | 11 Apr.                   | 0             | 0            | 0                                    | 9 Apr.                                                                 | 16                 | 24 Mar.                                             | 22–24 Mar.                                                        | 0                                                                  |
|      |       | 11 Apr.                                                                                                 | 0             | 0            | 14 Apr.                   | 0             | 0            | 0                                    | 12 Apr.                                                                | 13                 | 30 Mar.                                             | 28–30 Mar.                                                        | 0.25                                                               |
|      |       | 14 Apr.                                                                                                 | 0             | 0            | 18 Apr.                   | 0             | 0            | 0                                    | 16 Apr.                                                                | 11                 | 5 Apr.                                              | 3– 5 Apr.                                                         | 0                                                                  |
|      |       | 18 Apr.                                                                                                 | 0             | 0            | 21 Apr.                   | 0             | 0            | 0                                    | 19 Apr.                                                                | 11                 | 8 Apr.                                              | 6– 8 Apr.                                                         | 2.00                                                               |
|      |       | 21 Apr.                                                                                                 | 0             | 0            | 25 Apr.                   | 0             | 0            | 0                                    | 23 Apr.                                                                | 11                 | 12 Apr.                                             | 10–12 Apr.                                                        | 2.00                                                               |
| 2018 | H     | 25 Apr.                                                                                                 | 0             | 0            | 28 Apr.                   | 2.5           | 0.5          | 0                                    | 26 Apr.                                                                | 10                 | 16 Apr.                                             | 14–16 Apr.                                                        | 1.00                                                               |
|      |       | 23 Mar.                                                                                                 | 0             | 0            | 30 Mar.                   | 0             | 0            | 0                                    | 26 Mar.                                                                | 20                 | 6 Mar.                                              | 4– 6 Mar.                                                         | 1.50                                                               |
|      |       | 30 Mar.                                                                                                 | 0             | 0            | 2 Apr.                    | 0.7           | 0.1          | 0                                    | 31 Mar.                                                                | 16                 | 15 Mar.                                             | 13–15 Mar.                                                        | 2.00                                                               |
|      |       | 2 Apr.                                                                                                  | 0.7           | 0.1          | 5 Apr.                    | 4.7           | 0.9          | 0                                    | 3 Apr.                                                                 | 14                 | 20 Mar.                                             | 18–20 Mar.                                                        | 2.00                                                               |
|      |       | 5 Apr.                                                                                                  | 4.7           | 0.9          | 10 Apr.                   | 6.0           | 1.2          | 0                                    | 7 Apr.                                                                 | 11                 | 27 Mar.                                             | 25–27 Mar.                                                        | 1.00                                                               |
|      |       | 10 Apr.                                                                                                 | 6.0           | 1.2          | 13 Apr.                   | 10.7          | 2.1          | 0                                    | 11 Apr.                                                                | 11                 | 31 Mar.                                             | 29–31 Mar.                                                        | 0.25                                                               |
|      |       | 13 Apr.                                                                                                 | 10.7          | 2.1          | 18 Apr.                   | 80.7          | 17.9         | 1                                    | 15 Apr.                                                                | 11                 | 4 Apr.                                              | 2– 4 Apr.                                                         | 1.50                                                               |
|      |       | 18 Apr.                                                                                                 | 80.7          | 17.9         | 21 Apr.                   | 93.3          | 24.3         | 1                                    | 19 Apr.                                                                | 12                 | 7 Apr.                                              | 5– 7 Apr.                                                         | 1.50                                                               |
|      |       | 21 Apr.                                                                                                 | 93.3          | 24.3         | 26 Apr.                   | 100           | 28.5         | 0                                    | 23 Apr.                                                                | 10                 | 13 Apr.                                             | 11–13 Apr.                                                        | 0                                                                  |
|      | I     | 20 Mar.                                                                                                 | 0             | 0            | 27 Mar.                   | 0             | 0            | 0                                    | 23 Mar.                                                                | 19                 | 4 Mar.                                              | 2– 4 Mar.                                                         | 1.50                                                               |

Table S3 (continued)

| Year | Field | Disease development occurrence (whether incidence or severity have increased by $\geq 10\%$ per 5 days) |               |              |                    |               |              |                               | Putative date of disease development                            |             |                                              | Number of favourable meteorological condition days         |                                                             |
|------|-------|---------------------------------------------------------------------------------------------------------|---------------|--------------|--------------------|---------------|--------------|-------------------------------|-----------------------------------------------------------------|-------------|----------------------------------------------|------------------------------------------------------------|-------------------------------------------------------------|
|      |       | Starting point of each investigation                                                                    |               |              | Next investigation |               |              | Decision:<br>0, no;<br>1, yes | Disease development<br>(Date C: the middle day of Date A and B) | Latent days | Date D<br>(Date back-calculated from Date C) | Infection period<br>(the previous 3 days including Date D) | Favourable and marginal conditions output by the risk model |
|      |       | Date A                                                                                                  | Incidence (%) | Severity (%) | Date B             | Incidence (%) | Severity (%) |                               |                                                                 |             |                                              |                                                            |                                                             |
| 2018 | I     | 27 Mar.                                                                                                 | 0             | 0            | 30 Mar.            | 0             | 0            | 0                             | 28 Mar.                                                         | 18          | 10 Mar.                                      | 8–10 Mar.                                                  | 1.00                                                        |
|      |       | 30 Mar.                                                                                                 | 0             | 0            | 2 Apr.             | 24.0          | 4.8          | 1                             | 31 Mar.                                                         | 16          | 15 Mar.                                      | 13–15 Mar.                                                 | 2.00                                                        |
|      |       | 2 Apr.                                                                                                  | 24.0          | 4.8          | 5 Apr.             | 27.3          | 5.6          | 0                             | 3 Apr.                                                          | 14          | 20 Mar.                                      | 18–20 Mar.                                                 | 2.00                                                        |
|      |       | 5 Apr.                                                                                                  | 27.3          | 5.6          | 10 Apr.            | 17.3          | 3.6          | 0                             | 7 Apr.                                                          | 11          | 27 Mar.                                      | 25–27 Mar.                                                 | 1.00                                                        |
|      |       | 10 Apr.                                                                                                 | 17.3          | 3.6          | 13 Apr.            | 15.3          | 3.1          | 0                             | 11 Apr.                                                         | 11          | 31 Mar.                                      | 29–31 Mar.                                                 | 0.25                                                        |
|      |       | 13 Apr.                                                                                                 | 15.3          | 3.1          | 16 Apr.            | 70.7          | 14.4         | 1                             | 14 Apr.                                                         | 11          | 3 Apr.                                       | 1– 3 Apr.                                                  | 0.75                                                        |
|      |       | 16 Apr.                                                                                                 | 70.7          | 14.4         | 20 Apr.            | 96.7          | 22.4         | 1                             | 18 Apr.                                                         | 12          | 6 Apr.                                       | 4– 6 Apr.                                                  | 2.25                                                        |
|      |       | 20 Apr.                                                                                                 | 96.7          | 22.4         | 23 Apr.            | 100           | 25.2         | 0                             | 21 Apr.                                                         | 10          | 11 Apr.                                      | 9–11 Apr.                                                  | 0                                                           |
|      |       | 23 Apr.                                                                                                 | 100           | 25.2         | 27 Apr.            | 100           | 27.5         | 0                             | 25 Apr.                                                         | 11          | 14 Apr.                                      | 12–14 Apr.                                                 | 0                                                           |
| 2018 | B     | 30 Mar.                                                                                                 | 0             | 0            | 3 Apr.             | 22.0          | 4.4          | 1                             | 1 Apr.                                                          | 16          | 16 Mar.                                      | 14–16 Mar.                                                 | 1.25                                                        |
|      |       | 3 Apr.                                                                                                  | 22.0          | 4.4          | 9 Apr.             | 14.0          | 2.8          | 0                             | 6 Apr.                                                          | 10          | 27 Mar.                                      | 25–27 Mar.                                                 | 1.00                                                        |
|      |       | 9 Apr.                                                                                                  | 14.0          | 2.8          | 13 Apr.            | 15.3          | 3.1          | 0                             | 11 Apr.                                                         | 11          | 31 Mar.                                      | 29–31 Mar.                                                 | 0.25                                                        |
|      |       | 13 Apr.                                                                                                 | 15.3          | 3.1          | 16 Apr.            | 66.7          | 13.3         | 1                             | 14 Apr.                                                         | 11          | 3 Apr.                                       | 1– 3 Apr.                                                  | 0.75                                                        |
|      |       | 16 Apr.                                                                                                 | 66.7          | 13.3         | 20 Apr.            | 100           | 32.9         | 1                             | 18 Apr.                                                         | 12          | 6 Apr.                                       | 4– 6 Apr.                                                  | 2.25                                                        |
|      |       | 20 Apr.                                                                                                 | 100           | 32.9         | 23 Apr.            | 100           | 38.9         | 0                             | 21 Apr.                                                         | 10          | 11 Apr.                                      | 9–11 Apr.                                                  | 0                                                           |
|      |       | 23 Apr.                                                                                                 | 100           | 38.9         | 27 Apr.            | 100           | 36.7         | 0                             | 25 Apr.                                                         | 11          | 14 Apr.                                      | 12–14 Apr.                                                 | 0                                                           |
| 2018 | G     | 3 Apr.                                                                                                  | 1.3           | 0.3          | 9 Apr.             | 1.3           | 0.3          | 0                             | 6 Apr.                                                          | 10          | 27 Mar.                                      | 25–27 Mar.                                                 | 1.00                                                        |
|      |       | 9 Apr.                                                                                                  | 1.3           | 0.3          | 13 Apr.            | 1.3           | 0.3          | 0                             | 11 Apr.                                                         | 11          | 31 Mar.                                      | 29–31 Mar.                                                 | 0.25                                                        |
|      |       | 13 Apr.                                                                                                 | 1.3           | 0.3          | 16 Apr.            | 25.3          | 5.1          | 1                             | 14 Apr.                                                         | 11          | 3 Apr.                                       | 1– 3 Apr.                                                  | 0.75                                                        |
|      |       | 16 Apr.                                                                                                 | 25.3          | 5.1          | 20 Apr.            | 42.7          | 8.5          | 1                             | 18 Apr.                                                         | 12          | 6 Apr.                                       | 4– 6 Apr.                                                  | 2.25                                                        |
|      |       | 20 Apr.                                                                                                 | 42.7          | 8.5          | 23 Apr.            | 60.0          | 12.0         | 1                             | 21 Apr.                                                         | 10          | 11 Apr.                                      | 9–11 Apr.                                                  | 0                                                           |
|      |       | 23 Apr.                                                                                                 | 60.0          | 12.0         | 27 Apr.            | 58.0          | 11.6         | 0                             | 25 Apr.                                                         | 11          | 14 Apr.                                      | 12–14 Apr.                                                 | 0                                                           |
|      |       | 27 Apr.                                                                                                 | 58.0          | 11.6         | 1 May              | 100           | 38.5         | 1                             | 29 Apr.                                                         | 10          | 19 Apr.                                      | 17–19 Apr.                                                 | 1.00                                                        |
|      |       | 1 May                                                                                                   | 100           | 38.5         | 7 May              | 100           | 52.5         | 1                             | 4 May                                                           | 10          | 24 Apr.                                      | 22–24 Apr.                                                 | 2.00                                                        |
|      |       | 7 May                                                                                                   | 100           | 52.5         | 11 May             | 100           | 59.5         | 0                             | 9 May                                                           | 10          | 29 Apr.                                      | 27–29 Apr.                                                 | 0.50                                                        |
|      |       | 11 May                                                                                                  | 100           | 59.5         | 14 May             | 100           | 75.2         | 1                             | 12 May                                                          | 10          | 2 May                                        | 30 Apr.– 2 May                                             | 1.00                                                        |

<sup>a</sup> See Fig.4 for the flow chart to evaluate the relationship between the meteorological conditions during putative infection period and the probability of disease development

**Table S4** Latent periods of *P. destructor* under each temperature condition used in this study<sup>a</sup>

|                      | Temperature (°C) |    |    |    |    |    |    |    |    |    |    |    |    |       |
|----------------------|------------------|----|----|----|----|----|----|----|----|----|----|----|----|-------|
|                      | 4–5              | 6  | 7  | 8  | 9  | 10 | 11 | 12 | 13 | 14 | 15 | 16 | 17 | 18–25 |
| Latent period (days) | 60               | 51 | 45 | 35 | 30 | 25 | 22 | 18 | 15 | 13 | 12 | 11 | 11 | 10    |

<sup>a</sup> We prepared this table based on the report of DEFRA (2002)

**Table S5** Further explanation of list of the fungicides included in fungicide experiments 1–5<sup>a</sup>

| Fungicide active ingredients (% a.i.)               | Trade name and formulation <sup>b</sup> | FRAC Code <sup>c</sup> | Dosage (%) <sup>d</sup> | Concentration of a.i. used <sup>e</sup> |
|-----------------------------------------------------|-----------------------------------------|------------------------|-------------------------|-----------------------------------------|
| Chlorothalonil 50%<br>+Benthiavalicarb-isopropyl 5% | Propose WDG                             | M5 + 40                | 0.1                     | Ch: 500 mg/L<br>Be: 50 mg/L             |
| Chlorothalonil 32% +Metalaxyl-M 3.3%                | Folio Gold SC                           | M5 + 4                 | 0.125                   | Ch: 400 µL/L<br>Me: 41.25 µL/L          |
| Chlorothalonil 40%                                  | Daconil 1000 SC                         | M5                     | 0.1                     | 400 µL/L                                |
| Mancozeb 80%                                        | Zimandaisen WP                          | M3                     | 0.25                    | 2000 mg/L                               |

<sup>a</sup> The number of replicates and the area of each experimental plot are the same as those of the unsprayed plot in Table 1. The numbers of infected plants placed in each plot in fungicide experiments 1-1, 1-2, 3, 4, and 5 were 4, 4, 2, 4, and 3, respectively (same as those of the unsprayed plot in Table 1). The pot-grown primary infected plants were temporarily removed from the experimental field during fungicide application and then returned to their original position

<sup>b</sup> WDG = water dispersible granule, SC = suspension concentrate, WP = wettable powder

<sup>c</sup> FRAC codes from the Fungicide Resistance Action Committee (<http://www.frac.info/frac/>)

<sup>d</sup> In Japan, fungicide solution is often sprayed at approximately 1000–2500 L/ha in onion fields. In this study, fungicide solution was sprayed at 1300 L/ha in experiment 2, 1500 L/ha in experiments 1-1, 1-2, and 3, and 2500 L/ha in experiments 4 and 5. Each fungicide applied in the field was dissolved in water based on the labelled rate

<sup>e</sup> Ch = Chlorothalonil, Be = Benthiavalicarb-isopropyl, Me = Metalaxyl-M

**Table S6** Temperature and precipitation during the period when the onion plants were cultivated in the main field<sup>a</sup>

| Crop season                 | Period    | Temperature       |                   |           | Precipitation |
|-----------------------------|-----------|-------------------|-------------------|-----------|---------------|
|                             |           | Mean maximum (°C) | Mean minimum (°C) | Mean (°C) | Total (mm)    |
| Autumn 2015<br>–spring 2016 | Nov. 2015 | 20.1              | 12.4              | 15.9      | 145.5         |
|                             | Dec. 2015 | 13.7              | 5.7               | 9.5       | 104.0         |
|                             | Jan. 2016 | 9.7               | 2.6               | 6.1       | 82.0          |
|                             | Feb. 2016 | 12.0              | 2.8               | 7.1       | 75.5          |
|                             | Mar. 2016 | 16.3              | 6.7               | 11.2      | 76.5          |
|                             | Apr. 2016 | 22.2              | 12.4              | 17.1      | 246.5         |
|                             | May 2016  | 27.0              | 16.1              | 21.3      | 275.5         |
| Autumn 2016<br>–spring 2017 | Nov. 2016 | 18.2              | 9.6               | 13.7      | 155.0         |
|                             | Dec. 2016 | 14.0              | 5.4               | 9.4       | 78.0          |
|                             | Jan. 2017 | 11.1              | 2.2               | 6.4       | 32.0          |
|                             | Feb. 2017 | 12.3              | 2.4               | 7.0       | 85.5          |
|                             | Mar. 2017 | 14.7              | 5.5               | 9.8       | 48.0          |
|                             | Apr. 2017 | 21.7              | 11.9              | 16.4      | 222.0         |
|                             | May 2017  | 26.8              | 15.9              | 20.9      | 111.0         |
| Autumn 2017<br>–spring 2018 | Nov. 2017 | 17.3              | 8.2               | 12.6      | 19.0          |
|                             | Dec. 2017 | 10.4              | 1.9               | 6.1       | 17.0          |
|                             | Jan. 2018 | 8.8               | 1.0               | 4.6       | 70.0          |
|                             | Feb. 2018 | 10.2              | 1.3               | 5.4       | 49.0          |
|                             | Mar. 2018 | 17.6              | 6.5               | 11.8      | 173.5         |
|                             | Apr. 2018 | 22.6              | 11.7              | 17.1      | 169.5         |
|                             | May 2018  | 25.6              | 16.4              | 20.8      | 170.5         |

<sup>a</sup> We used data from the meteorological station at Saga (33°15.9'N, 130°18.3'E) in Kyushu, western Japan, monitored by the Japan Meteorological Agency
